# Supplementary material for: Electrospun Janus-like pellicle displays coinstantaneous tri-function of aeolotropic conduction, magnetism and luminescence
Source: RSC Adv. 2019 Sep 30;9(53):30890–904. doi: 10.1039/c9ra06444c (PMC9072224; doi:10.1039/c9ra06444c)
Supplement: RA-009-C9RA06444C-s001 [file RA-009-C9RA06444C-s001.pdf]

## Supporting Information

### **Electrospun Janus-like Pellicle Displays Coinstantaneous Tri-function of Aeolotropic Conduction, Magnetism and Luminescence**

Yunrui Xie, Qianli Ma, Haina Qi, Yan Song, Jiao Tian, Makiyyu Abdullahi Musa, Wensheng Yu,

Xiangting Dong\*, Dan Li, Guixia Liu

Key Laboratory of Applied Chemistry and Nanotechnology at Universities of Jilin Province,  
Changchun University of Science and Technology, Changchun 130022

\*Corresponding author: Fax: 86 0431 85383815; Tel: 86 0431 85582574; E-mail:

dongxiangting888@163.com

#### **Experimental Sections**

##### **Chemicals:**

Eu<sub>2</sub>O<sub>3</sub> (99.99 %), Tb<sub>4</sub>O<sub>7</sub> (99.99 %), concentrated nitric acid, benzoic acid (BA), 1,10-phenanthroline (phen), anhydrous ethanol, benzoylperoxide (BPO), aniline (ANI), (1S)-(+)-camphor-10 sulfonic acid (CSA), ammonium persulfate (APS), FeSO<sub>4</sub>·7H<sub>2</sub>O, FeCl<sub>3</sub>·6H<sub>2</sub>O, NH<sub>4</sub>NO<sub>3</sub>, polyethylene glycol (PEG, Mr≈20 000), ammonia, oleic acid (OA), methylmethacrylate (MMA), *N,N*-dimethylformamide (DMF), CHCl<sub>3</sub>. Deionized water was homemade. All the chemicals were analytically pure reagents and directly used as received without further purification.

##### **Characterization**

The morphologies and structures of the samples were tested *via* a field emission scanning electron microscope (FESEM, XL-30) equipped with an energy-dispersive X-ray spectroscopy

(EDS). An optical microscope (OM, CVM500E) was employed to obtain the images of the samples. The conductive determinations were conducted on a Hall Effect measurement system (ECOPIA HMS-3000). The luminescence of the specimens was analyzed by using a Hitachi fluorescent spectrophotometer F-7000. The crystallographic information was gained by X-ray diffractometer (XRD, Bruker D8 FOCUS) by using a Cu K $\alpha$  radiation source. The magnetism of the samples was detected by a vibrating sample magnetometer (VSE, MPMS SQUID XL). All tests were carried out at room temperature.

### Morphology and structure

**Fig. S1a** is the SEM image of CLJN, where [PANI/PMMA]/[Eu(BA)<sub>3</sub>phen/PMMA] Janus-like microribbons are disordered and the surface of microribbons is smooth. The width and thickness of [PANI/PMMA]/[Eu(BA)<sub>3</sub>phen/PMMA] Janus-like microribbons in CLJN respectively are *ca.* 21.43 $\pm$ 0.72  $\mu$ m (**Fig. S2a**) and 1.3  $\mu$ m. **Fig. S1b** and **Fig. S1c** respectively are SEM images of CLCA and CLCN. PANI/PMMA/Eu(BA)<sub>3</sub>phen composite microribbons are aligned in the same direction and the width and thickness respectively are *ca.* 19.33 $\pm$ 0.41  $\mu$ m (**Fig. S2b**) and 1.3  $\mu$ m. In CLCN, PANI/PMMA/Eu(BA)<sub>3</sub>phen composite microribbons are disordered, and the width and thickness of respectively are *ca.* 19.07 $\pm$ 0.41  $\mu$ m (**Fig. S2c**) and 1.3  $\mu$ m. In MLJN (**Fig. S1d**), [Fe<sub>3</sub>O<sub>4</sub>/PMMA]/[Tb(BA)<sub>3</sub>phen/PMMA] Janus-like microribbons are disordered and the surface of microribbons is slightly rough. The width and thickness of [Fe<sub>3</sub>O<sub>4</sub>/PMMA]/[Tb(BA)<sub>3</sub>phen/PMMA] Janus-like microribbons in MLJN respectively are *ca.* 19.30 $\pm$ 0.85  $\mu$ m (**Fig. S2d**) and 1.3  $\mu$ m. **Fig. S1e** and **Fig. S1f** respectively are SEM images of MLCA and MLCN. It can be seen that almost Fe<sub>3</sub>O<sub>4</sub>/PMMA/Tb(BA)<sub>3</sub>phen/PMMA composite microribbons in MLCA are aligned in the same direction and the width and thickness respectively are *ca.* 20.54 $\pm$ 0.23  $\mu$ m (**Fig. S2e**) and 1.3  $\mu$ m. In MLCN, the surface of disordered Fe<sub>3</sub>O<sub>4</sub>/PMMA/Tb(BA)<sub>3</sub>phen/PMMA composite

microribbons is slightly rough, and the width and thickness of respectively are *ca.*  $18.32 \pm 0.25$   $\mu\text{m}$  (**Fig. S2f**) and  $1.3$   $\mu\text{m}$ .

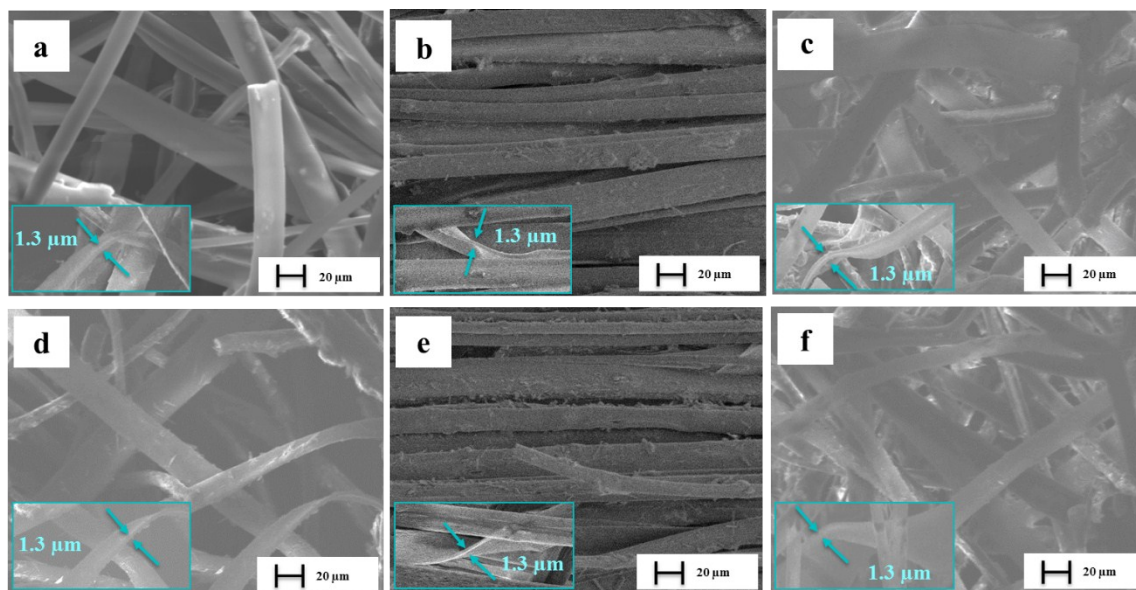

**Fig. S1** SEM images of CLJN (a), CLCA (b), CLCN (c), MLJN (d), MLCA (e) and MLCN

(f)

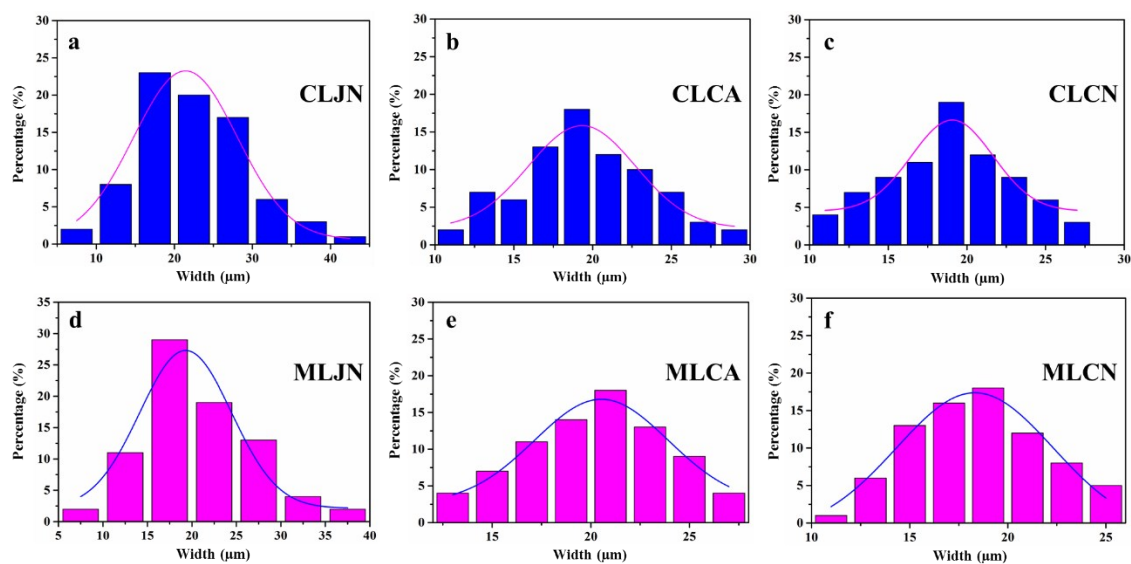

**Fig. S2** Width distribution histograms of CLJN (a), CLCA (b), CLCN (c), MLJN (d), MLCA

(e) and MLCN (f)

A clear interface is observed between approximately transparent  $\text{Eu}(\text{BA})_3\text{phen/PMMA}$  and the dark green  $\text{PANI/PMMA}$ , as shown in **Fig. S3a**. It proves that  $[\text{PANI/PMMA}]/[\text{Eu}(\text{BA})_3\text{phen/PMMA}]$  Janus-like microribbon has favorable Janus-like structure in CLJN. However, no a clear interface in  $\text{PANI/PMMA/Eu}(\text{BA})_3\text{phen}$  composite microribbons for CLCA (**Fig. S3b**) and CLCN (**Fig. S3c**) is observed. As seen from **Fig. S3d**, a clear interface is observed between approximately transparent  $\text{Tb}(\text{BA})_3\text{phen/PMMA}$  and brown  $\text{Fe}_3\text{O}_4/\text{PMMA}$ , which indicates that  $[\text{Fe}_3\text{O}_4/\text{PMMA}]/[\text{Tb}(\text{BA})_3\text{phen/PMMA}]$  Janus-like microribbon is successfully prepared in MLJN. For MLCA (**Fig. S3e**) and MLCN (**Fig. S3f**), no apparent interface is found in  $\text{Fe}_3\text{O}_4/\text{PMMA/Tb}(\text{BA})_3\text{phen/PMMA}$  composite microribbons. These results show that Janus-like microribbon can achieve micro-zoning and reduce interferences among different functional substances. However, composite microribbon cannot achieve micro-zoning and cause harmful influences among different properties.

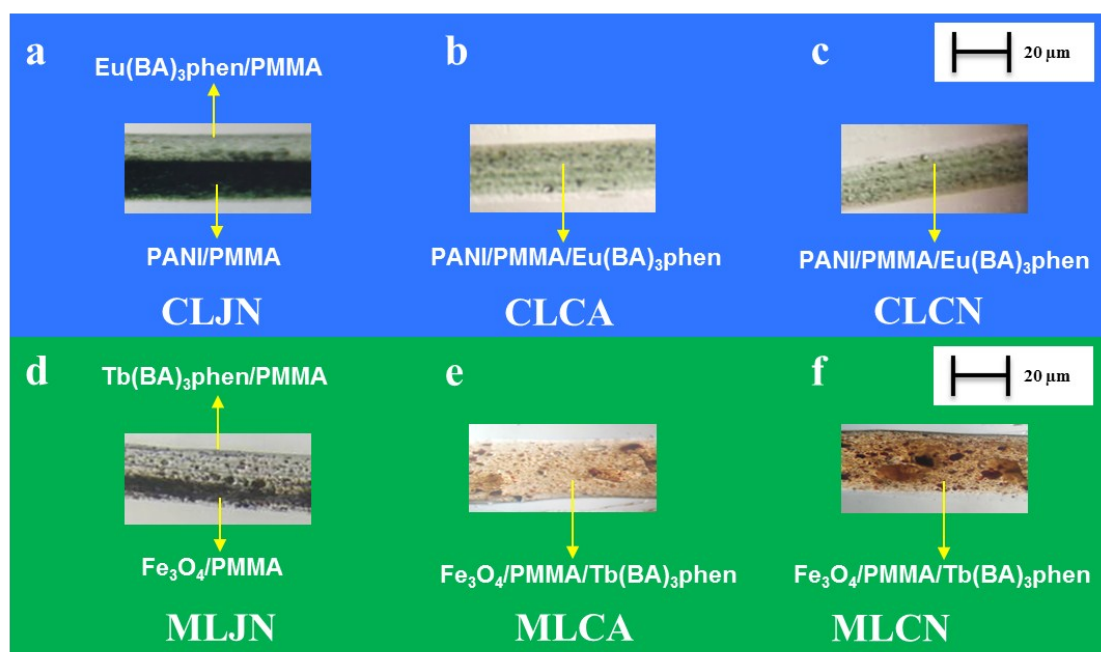

**Fig. S3** OM images of single  $[\text{PANI/PMMA}]/[\text{Eu}(\text{BA})_3\text{phen/PMMA}]$  Janus-like microribbon in CLJN (a), single  $\text{PANI/PMMA/Eu}(\text{BA})_3\text{phen}$  composite microribbon in CLCA (b), single  $\text{PANI/PMMA/Eu}(\text{BA})_3\text{phen}$  composite microribbon in CLCN (c), single

[Fe<sub>3</sub>O<sub>4</sub>/PMMA]/[Tb(BA)<sub>3</sub>phen/PMMA] Janus-like microribbon in MLJN (d), single Fe<sub>3</sub>O<sub>4</sub>/PMMA/Tb(BA)<sub>3</sub>phen/PMMA composite microribbons in MLCA (e) and single Fe<sub>3</sub>O<sub>4</sub>/PMMA/Tb(BA)<sub>3</sub>phen/PMMA composite microribbon in MLCN (f)

## Crystallography

**Fig. S4** demonstrates the XRD patterns of ML layer, MLJN, MLCA and MLCN doped with the same amounts of Fe<sub>3</sub>O<sub>4</sub> NPs (Fe<sub>3</sub>O<sub>4</sub>:PMMA=1:1). The diffraction peaks of MLJN, MLCA and MLCN can well match the standard card (PDF # 75-0449) of cubic phase of Fe<sub>3</sub>O<sub>4</sub> and ML layer. No diffraction peaks of impurities are detected, indicating that pure-phase Fe<sub>3</sub>O<sub>4</sub> NPs are successfully introduced into ML layer and three contrast samples.

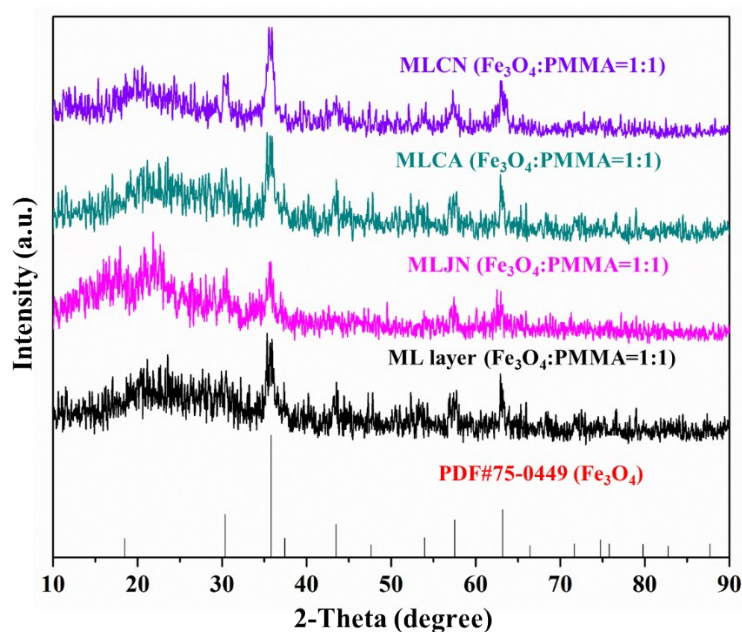

**Fig. S4** XRD patterns of ML layer, MLJN, MLCA and MLCN doped with the same amounts of Fe<sub>3</sub>O<sub>4</sub> NPs (Fe<sub>3</sub>O<sub>4</sub>:PMMA=1:1)
